# Supplementary material
Source: publisher figshare collection journal article supplement (https://gsapubs.figshare.com/articles/dataset/_/24578968)
Supplement: Supplementary file 1 [file 2]

## Sheet: input_grouped
ID	Host_rock	s	t	Reference
G56G-1	Sandstone	5.16746	0.660195	Galland et al. (2018), Fig. 5.6
G56G-2	Sandstone	14.4125	1.23808	Galland et al. (2018), Fig. 5.6
P3ED1-1	Mudstone	0.0747497	0.0157768	Poppe et al. (2020), Fig. 3E
P3ED1-2	Mudstone	0.137903	0.0267409	Poppe et al. (2020), Fig. 3E
P3ED1-3	Mudstone	0.205979	0.0429852	Poppe et al. (2020), Fig. 3E
P3ED2-1	Mudstone	0.0280884	0.0206905	Poppe et al. (2020), Fig. 3E
P3ED2-2	Mudstone	0.0551868	0.0253108	Poppe et al. (2020), Fig. 3E
P3ED2-3	Mudstone	0.120393	0.034808	Poppe et al. (2020), Fig. 3E
P3ED2-4	Mudstone	0.17888	0.034808	Poppe et al. (2020), Fig. 3E
P5AD-1	Mudstone	0.0120208	0.00161971	Poppe et al. (2020), Fig. 5A
P5AD-2	Mudstone	0.0349704	0.00421034	Poppe et al. (2020), Fig. 5A
P5AD-3	Mudstone	0.0586585	0.00642319	Poppe et al. (2020), Fig. 5A
P5AD-4	Mudstone	0.0988003	0.00946429	Poppe et al. (2020), Fig. 5A
P5CD1-1	Mudstone	0.00138027	0.000967995	Poppe et al. (2020), Fig. 5C
P5CD1-2	Mudstone	0.00493641	0.00208908	Poppe et al. (2020), Fig. 5C
P5CD1-3	Mudstone	0.00740944	0.00249955	Poppe et al. (2020), Fig. 5C
P5CD1-4	Mudstone	0.0106244	0.00341872	Poppe et al. (2020), Fig. 5C
P5CD1-5	Mudstone	0.0139491	0.00487493	Poppe et al. (2020), Fig. 5C
P5CD1-6	Mudstone	0.0204195	0.00861732	Poppe et al. (2020), Fig. 5C
P5CD2-1	Mudstone	0.00234826	0.000618408	Poppe et al. (2020), Fig. 5C
P5CD2-2	Mudstone	0.00419565	0.000985474	Poppe et al. (2020), Fig. 5C
P5CD2-3	Mudstone	0.00629377	0.00174974	Poppe et al. (2020), Fig. 5C
P5CD2-4	Mudstone	0.00867699	0.00350552	Poppe et al. (2020), Fig. 5C
P5CD2-5	Mudstone	0.0119456	0.00540896	Poppe et al. (2020), Fig. 5C
P5CD2-6	Mudstone	0.016002	0.00825026	Poppe et al. (2020), Fig. 5C
W1CD1-1	Gabbro	0.0303879	0.00182712	Walker et al. (2021), Fig. 1C
W1CD1-2	Gabbro	0.0775284	0.00315891	Walker et al. (2021), Fig. 1C
W1CD1-3	Gabbro	0.120768	0.00509127	Walker et al. (2021), Fig. 1C
W1CD1-4	Gabbro	0.187304	0.00738832	Walker et al. (2021), Fig. 1C
W1CD2-1	Gabbro	0.0101208	0.0015096	Walker et al. (2021), Fig. 1C
W1CD2-2	Gabbro	0.0319574	0.00487353	Walker et al. (2021), Fig. 1C
W1CD2-3	Gabbro	0.048543	0.00667525	Walker et al. (2021), Fig. 1C
W1CD2-4	Gabbro	0.113282	0.00819937	Walker et al. (2021), Fig. 1C
W1CD2-5	Gabbro	0.186818	0.0120169	Walker et al. (2021), Fig. 1C
W1DD1-1	Granite	0.0703284	0.0080314	Walker et al. (2021), Fig. 1D
W1DD1-2	Granite	0.163605	0.0109232	Walker et al. (2021), Fig. 1D
W1DD1-3	Granite	0.335207	0.0176273	Walker et al. (2021), Fig. 1D
W1FD1-1	Mudstone	0.00402454	0.00159298	Walker et al. (2021), Fig. 1F
W1FD1-2	Mudstone	0.0136011	0.00364985	Walker et al. (2021), Fig. 1F
W1FD1-3	Mudstone	0.0229691	0.00433333	Walker et al. (2021), Fig. 1F
W1FD1-4	Mudstone	0.0389799	0.00514361	Walker et al. (2021), Fig. 1F
W1FD1-5	Mudstone	0.0470626	0.00536355	Walker et al. (2021), Fig. 1F
W1FD2-1	Mudstone	0.00272494	0.00155573	Walker et al. (2021), Fig. 1F
W1FD2-2	Mudstone	0.0057712	0.00253258	Walker et al. (2021), Fig. 1F
W1FD2-3	Mudstone	0.00845423	0.00334322	Walker et al. (2021), Fig. 1F
W1FD2-4	Mudstone	0.0154484	0.00598828	Walker et al. (2021), Fig. 1F
W1FD3-1	Mudstone	0.00214284	0.00104885	Walker et al. (2021), Fig. 1F
W1FD3-2	Mudstone	0.0061158	0.00178104	Walker et al. (2021), Fig. 1F
W1FD3-3	Mudstone	0.00834354	0.00252327	Walker et al. (2021), Fig. 1F
W1FD3-4	Mudstone	0.0115682	0.00313725	Walker et al. (2021), Fig. 1F
W1FD3-5	Mudstone	0.0169038	0.00680501	Walker et al. (2021), Fig. 1F
W1GS-1	Sandstone	11.1114	0.765011	Walker et al. (2021), Fig. 1G
W1GS-2	Sandstone	7.79268	0.636449	Walker et al. (2021), Fig. 1G
W1GS-3	Sandstone	5.71415	0.444431	Walker et al. (2021), Fig. 1G
W1GS-4	Sandstone	3.7882	0.292795	Walker et al. (2021), Fig. 1G
W1GS-5	Sandstone	2.95562	0.172475	Walker et al. (2021), Fig. 1G
W1GS-6	Sandstone	2.84495	0.12397	Walker et al. (2021), Fig. 1G
S4D-1	Lava_flows	2.66989	0.801731	Schmiedel et al. (2021), Fig. 4
S4D-2	Lava_flows	4.83584	1.39476	Schmiedel et al. (2021), Fig. 4
S4D-3	Lava_flows	6.62934	1.99796	Schmiedel et al. (2021), Fig. 4
S4D-4	Lava_flows	8.42454	2.54009	Schmiedel et al. (2021), Fig. 4
