# Supplementary material
Source: publisher figshare collection journal article supplement (https://gsapubs.figshare.com/articles/dataset/_/24578968)

**Supplemental Material** (Köpping et al., 2023) – Uninterpreted photographs (Figure 2)

Figure 2A:

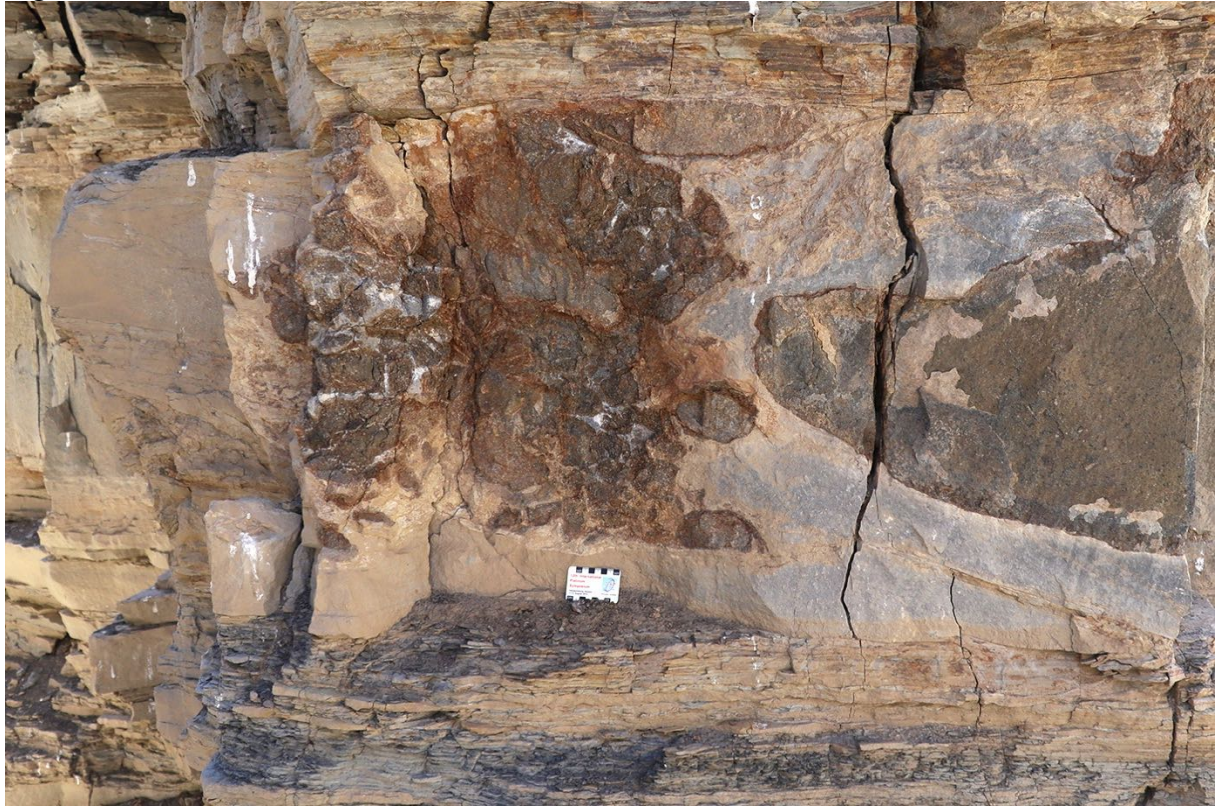

Figure 2A inset:

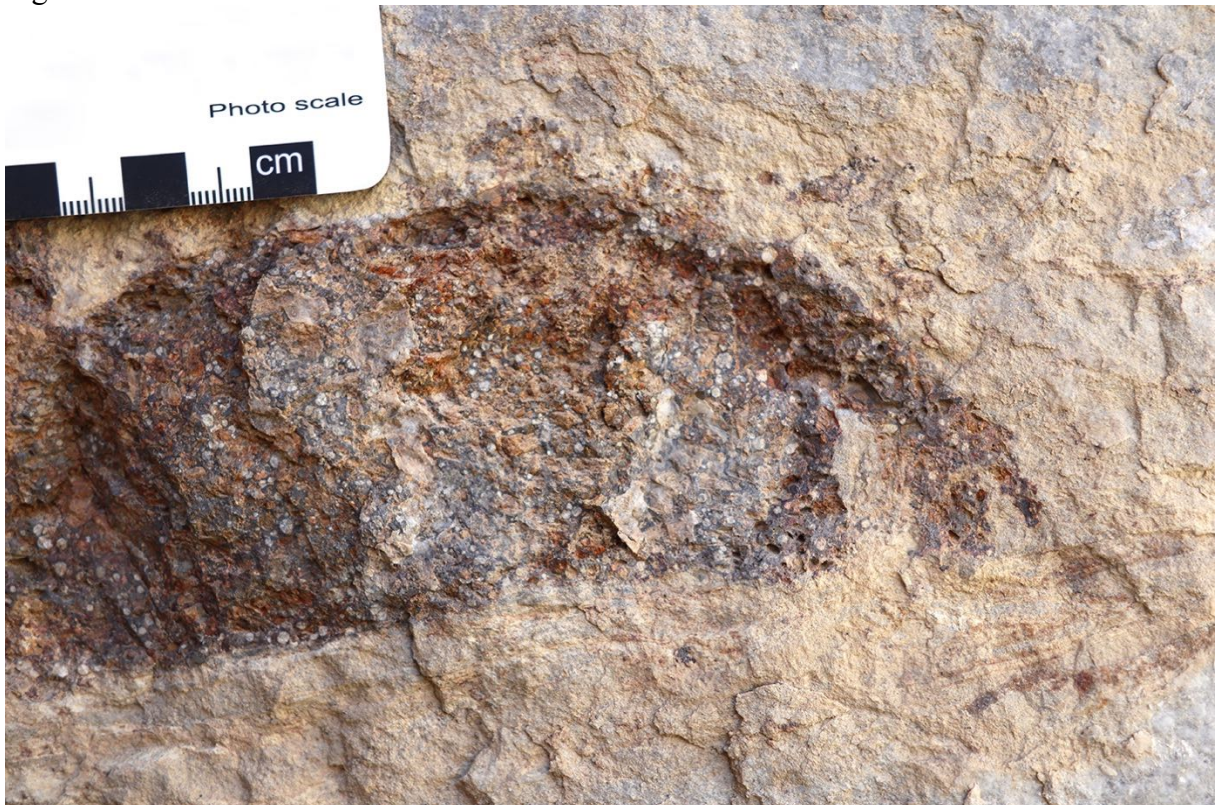



Figure 2B:

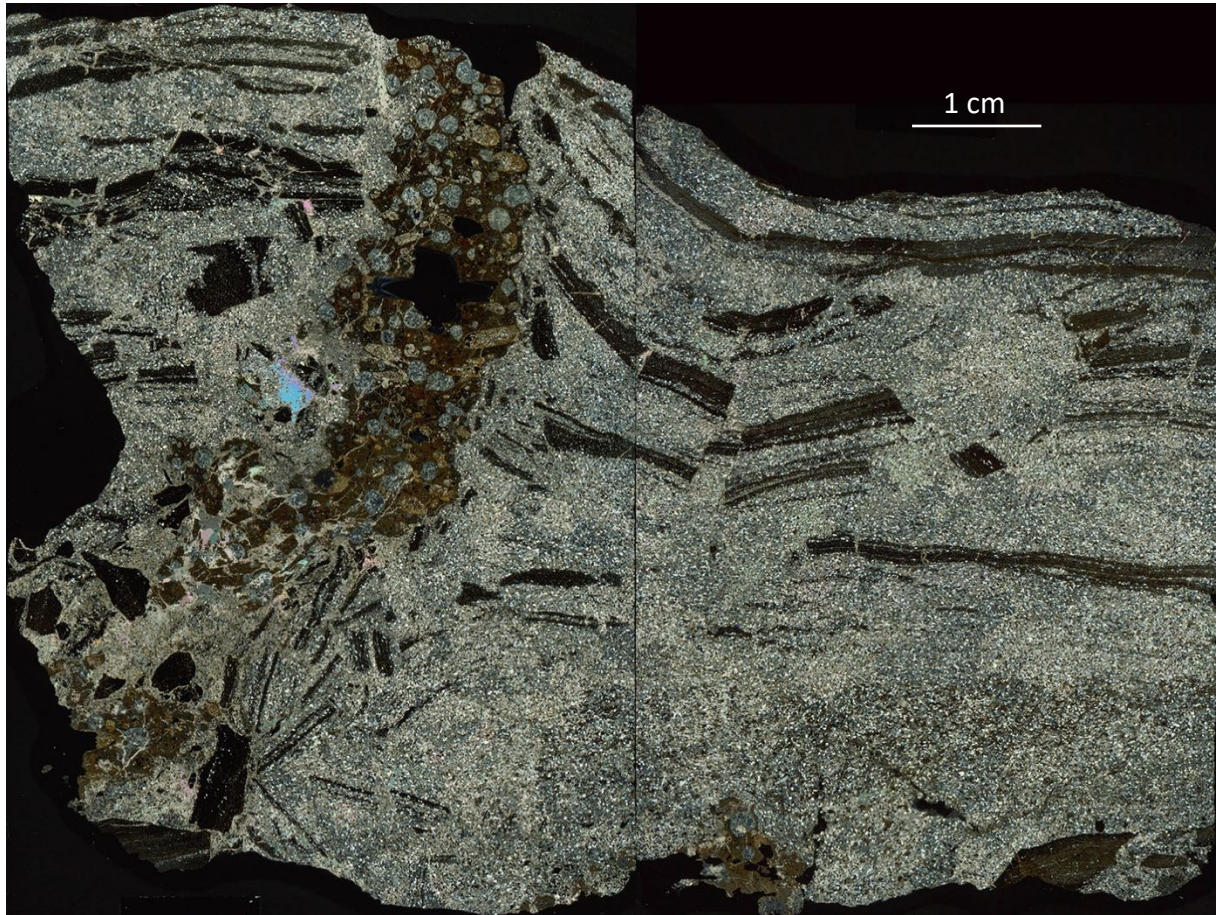



Figure 2B-i:

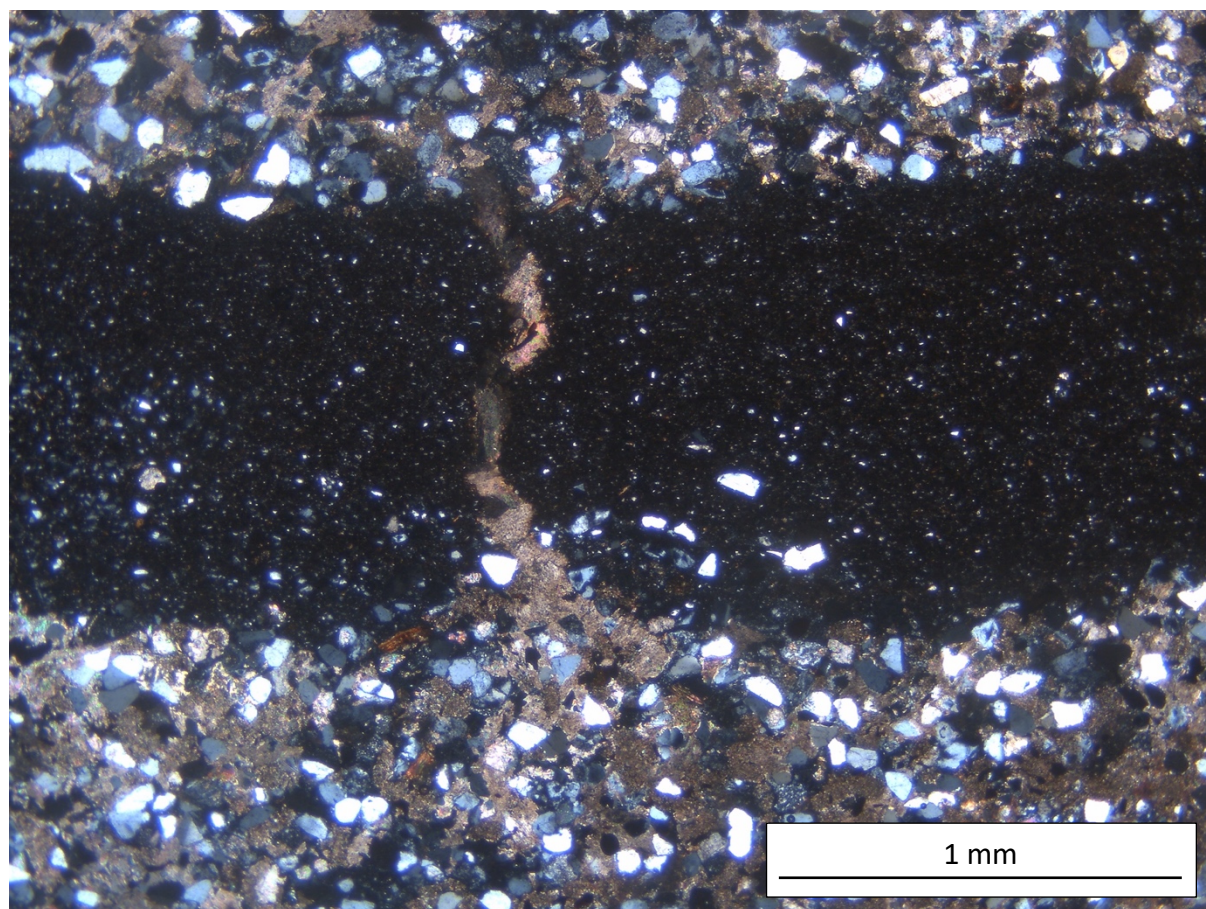

Figure 2B-ii:

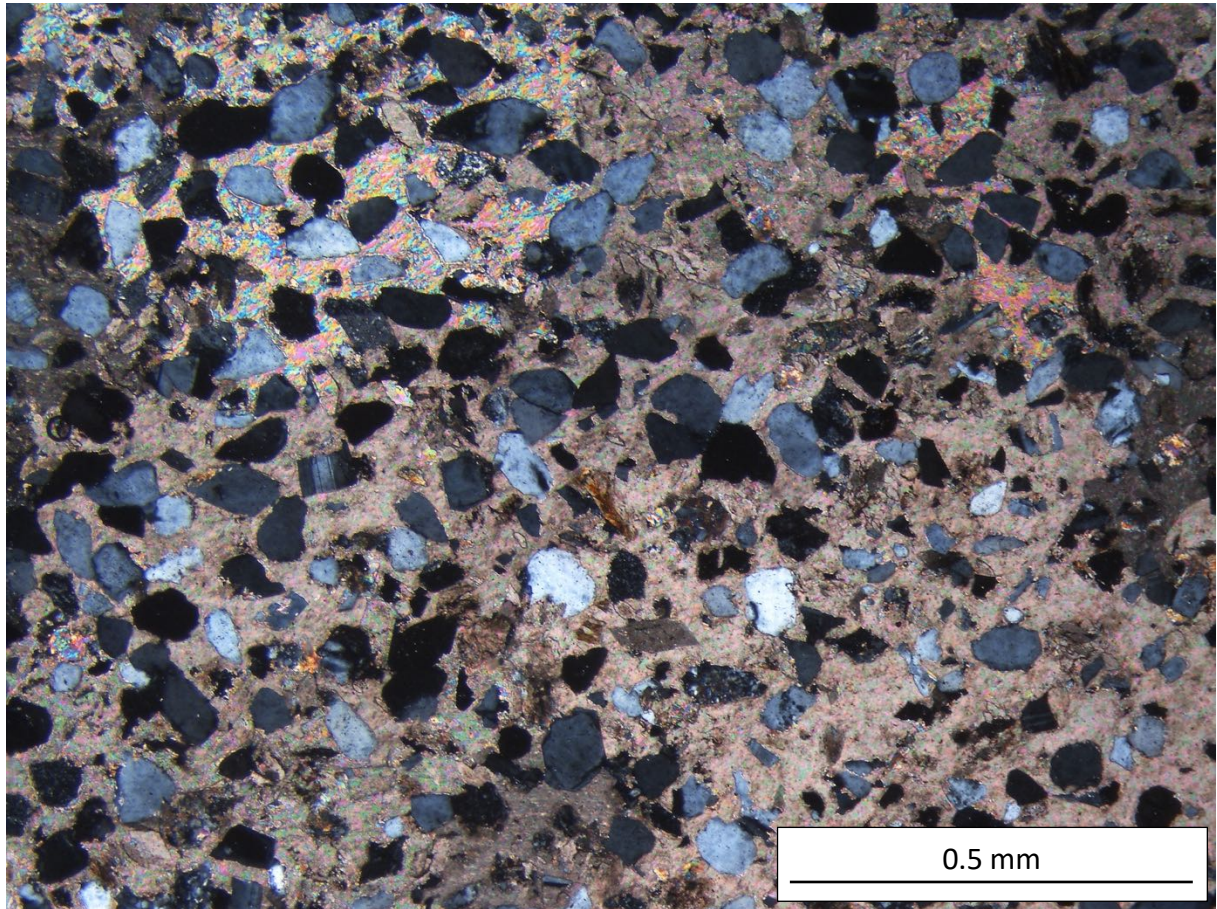

Supplement: Supplementary file 1 [file 2]
