# Supplementary material
Source: publisher figshare collection journal article supplement (https://gsapubs.figshare.com/articles/dataset/_/24578968)
Supplement: Supplementary file 2 [file 2]

Köpping, J., et al., 2023, Intrusion tip velocity controls the emplacement mechanism of sheet intrusions: *Geology*, <https://doi.org/10.1130/G51509.1>

## Supplemental Material

Geological map of the Highwood Mountains of Montana, western United States; uninterpreted, high-resolution images shown in Figure 2; Jupyter notebook used to perform thermal modeling and fracture tip velocity estimates; Excel spreadsheet with field constraints (i.e., fracture aperture and distance of aperture measurement to fracture tip) used to estimate fracture tip velocities.
