# Supplementary material
Source: publisher figshare collection journal article supplement (https://gsapubs.figshare.com/articles/dataset/_/24578968)
Supplement: Supplementary file 4 [file 2]

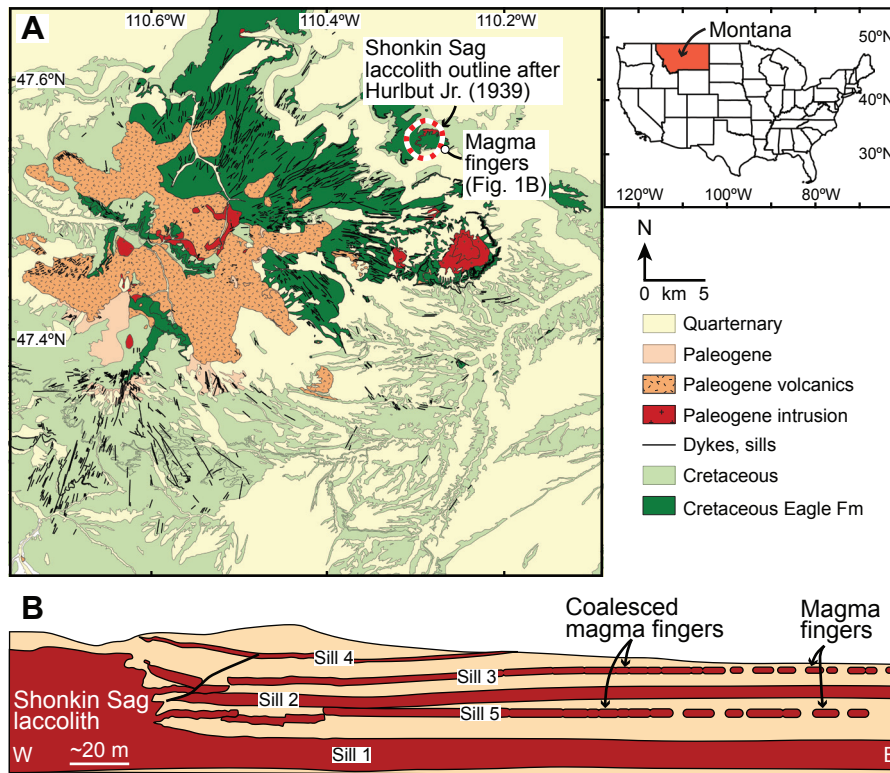

Figure S1. (A) Simplified geological map of the Highwood Mountains of Montana, USA. (B) Schematic cross section showing emerging sills and magma fingers at the SE Shonkin Sag laccolith margin.
